# Supplementary material for: On the electronic character of oxygen-transfer reactions
Source: Royal Society of Chemistry journal article supplement (doi:10.1039/b006280o), 2000-01-01
Supplement: b006280of2.doc [file b006280of2.doc]

# **d**

# HOMO

# * (O-O)

# **b**

# LUMO

# lone pair O

# **DMDO**

# HOMO

# * (O-O)

# **d**

# **b**

# LUMO

# lone pair O

# **MCPBA**

**Figure Sup-2.** Predominant orbital interactions of donation *d* and backdonation *b* according to the CDA of the transition states for ethylene epoxidation with DMDO and MCPBA.
